# Supplementary material for: In situ preparation of interconnected networks constructed by using flexible graphene/Sn sandwich nanosheets for high-performance lithium-ion battery anodes
Source: Royal Society of Chemistry journal article supplement (doi:10.1039/c5ta06550j), 2015-01-01
Supplement: c5ta06550j1.pdf [file c5ta06550j1.pdf]

Electronic Supplementary Material (ESI) for Journal of Materials Chemistry A.

This journal is © The Royal Society of Chemistry 2015

**Electronic Supplementary Information (ESI)**

## **Supporting Information for**

### **In Situ Preparation of Interconnected Networks Constructed by Flexible Graphene/Sn Sandwich Nanosheets for High-Performance Lithium-Ion Battery Anode**

Jian Qin <sup>a</sup>, Xiang Zhang <sup>a</sup>, Naiqin Zhao <sup>a,b</sup>, Chunsheng Shi <sup>a</sup>, En-Zuo Liu <sup>a</sup>, Jiajun Li <sup>a</sup>, and  
Chunnian He <sup>\*, a, b</sup>

<sup>a</sup> *School of Materials Science and Engineering and Tianjin Key Laboratory of Composites and  
Functional Materials, Tianjin University, Tianjin +86 300072, China*

<sup>b</sup> *Collaborative Innovation Center of Chemical Science and Engineering, Tianjin 300072, China*

\* Corresponding author.

E-mail addresses: cnhe08@tju.edu.cn (C. He)

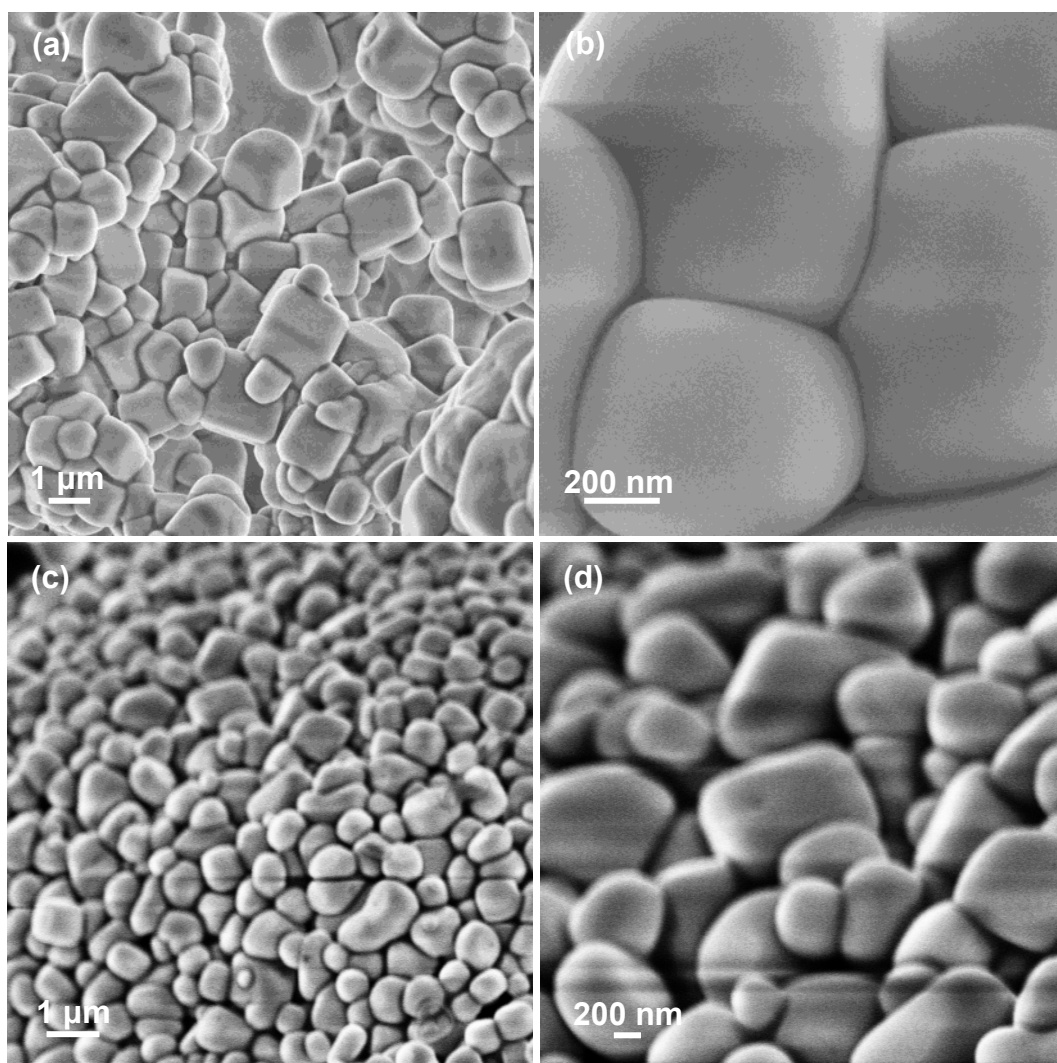

Figure S1. (a) and (b) SEM images of the complex of  $\text{SnCl}_2\text{-C}_6\text{H}_8\text{O}_7/\text{NaCl}$  after freeze-drying process, suggesting that the NaCl particles uniformly coated with a thin layer of  $\text{SnCl}_2\text{-C}_6\text{H}_8\text{O}_7$  complex were self-assembled into 3D structure during the freeze-drying process. (c) and (d) SEM images of the C-SnO<sub>2</sub> products before eliminating the NaCl, showing that the 3D self-assembly was well preserved after low-temperature calcination of the 3D  $\text{SnCl}_2\text{-C}_6\text{H}_8\text{O}_7/\text{NaCl}$  and the 3D C-SnO<sub>2</sub> were actually formed on the surface of 3D NaCl self-assembly.

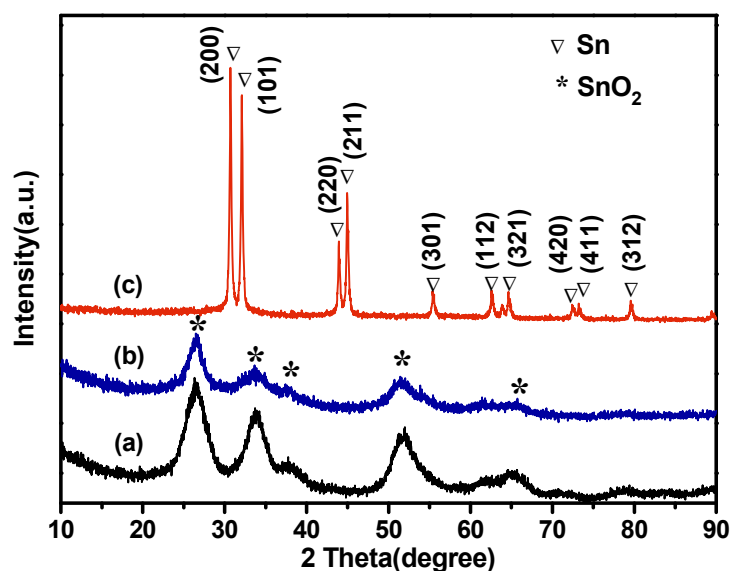

Figure S2. XRD patterns of (a) 3D SnO<sub>2</sub>/C/SnO<sub>2</sub>, (b) 3D SnO<sub>2</sub>/C/SnO<sub>2</sub>@C, and (c) 3D G/Sn/G networks.

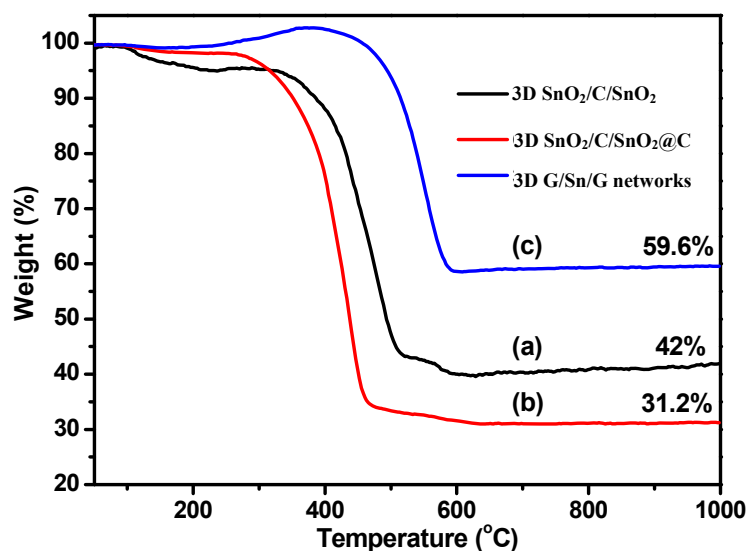

Figure S3. TGA of 3D SnO<sub>2</sub>/C/SnO<sub>2</sub>, 3D SnO<sub>2</sub>/C/SnO<sub>2</sub>@C, and 3D G/Sn/G networks. The Sn contents in the 3D G/Sn/G networks estimated from the thermal analysis are ca. 46.9 wt%. (The sample is annealed under air to oxidize Sn to SnO<sub>2</sub> and carbon to CO<sub>2</sub>. On the basis of the final weight of SnO<sub>2</sub>, the original content of Sn is calculated to be 46.9 wt %.) Comparing the weight loss of 3D SnO<sub>2</sub>/C/SnO<sub>2</sub> with that of 3D SnO<sub>2</sub>/C/SnO<sub>2</sub>@C, it can be calculated that approximately 10.8 wt% carbon is added during the hydrothermal process.

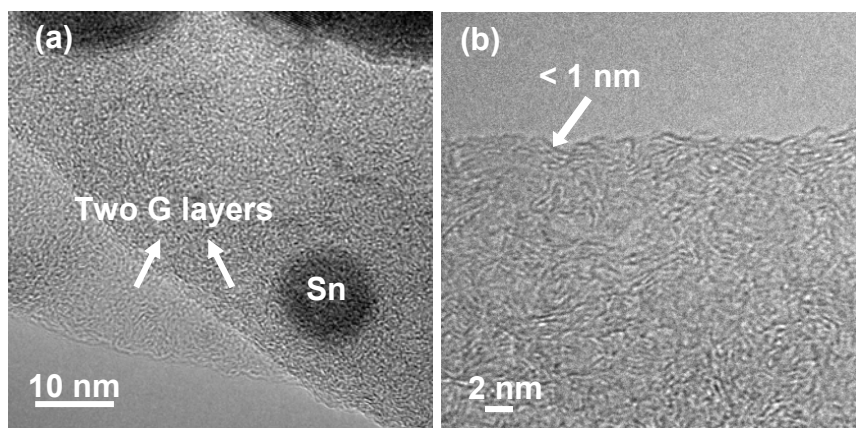

Figure S4. HRTEM images of 3D G/Sn/G networks.

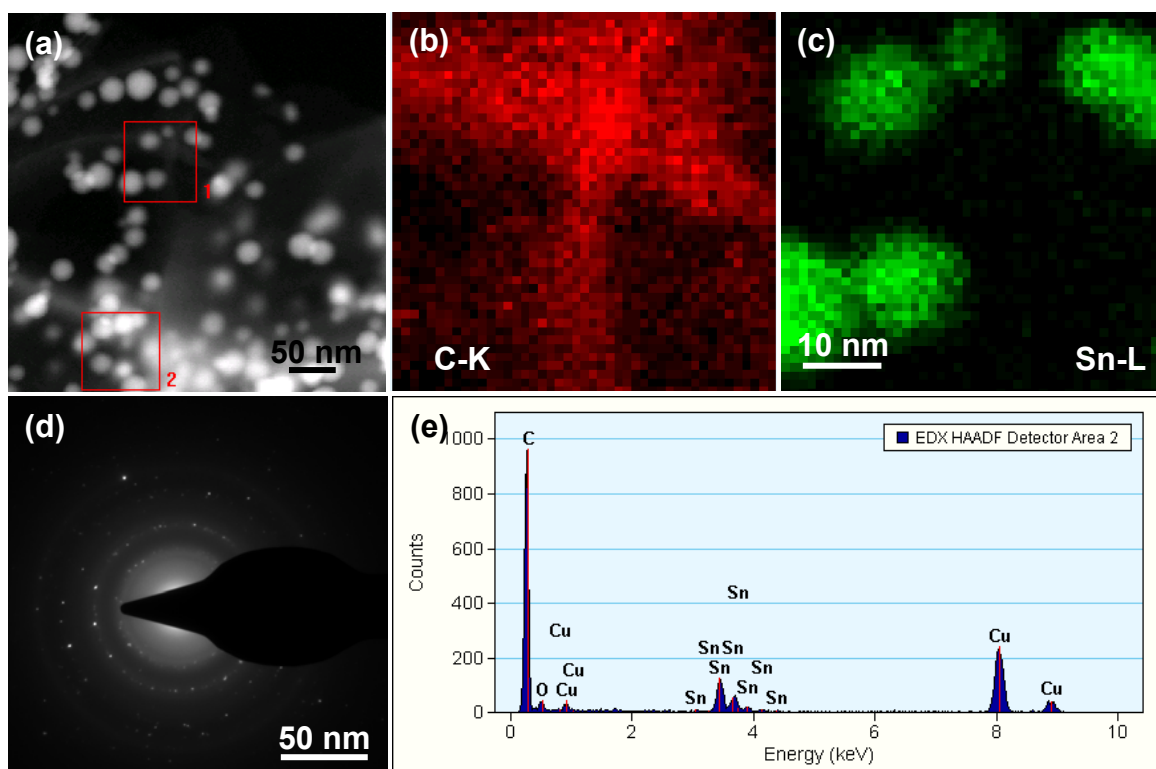

Figure S5. (a) STEM image of 3D G/Sn/G networks. (b) Carbon and (c) Sn element mapping images from area 1 in (a). (d) SAED pattern of a typical Sn nanoparticle. (e) EDX pattern from area 2 in (a).

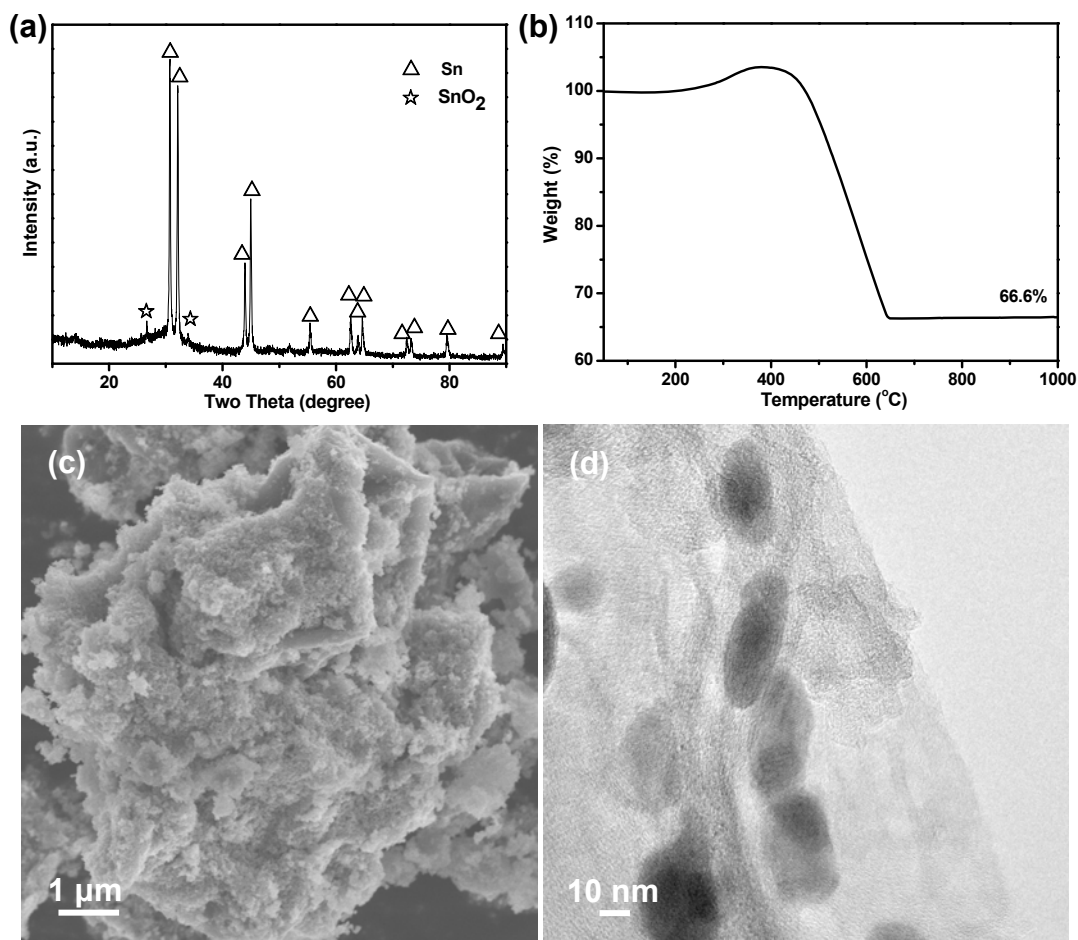

Figure S6. (a) XRD pattern and (b) TGA of G/Sn sandwich nanosheets, showing that the Sn content is about 52 wt.%. (c) SEM and (d) TEM images of G/Sn sandwich nanosheets, indicating a sandwich-like structure with graphene layers closely binding to both sides of metallic Sn nanoparticles or nanosheets.

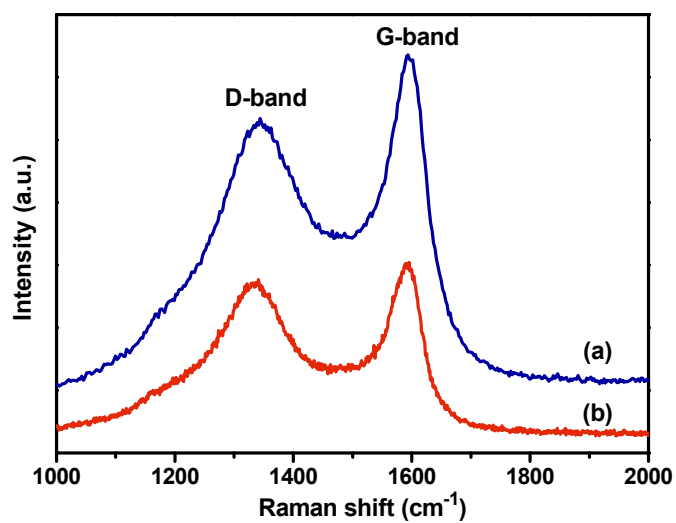

Figure S7. Raman spectra of (a) 3D G/Sn/G networks and (b) G/Sn sandwich nanosheets.

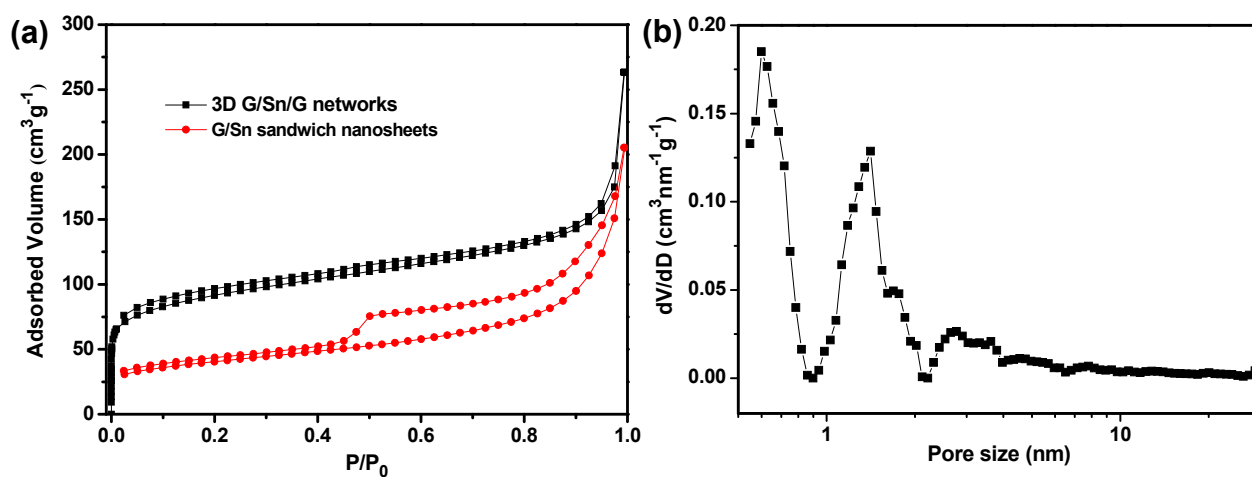

Figure S8. (a) Nitrogen adsorption–desorption isotherms of 3D G/Sn/G networks and G/Sn sandwich nanosheets, and (b) pore size distribution curve of 3D G/Sn/G networks.

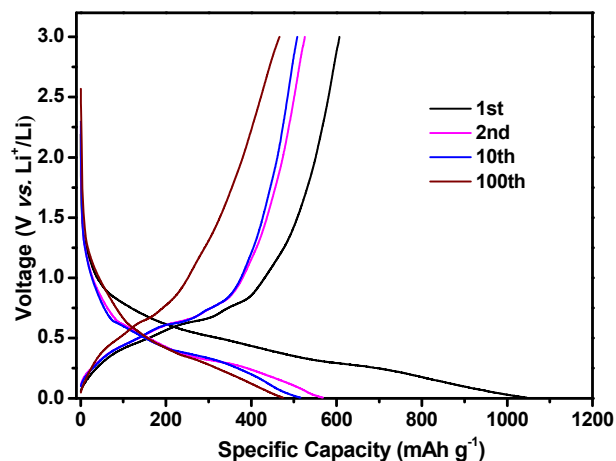

Figure S9. Galvanostatic discharge-charge profiles of G/Sn sandwich nanosheets at a current density of  $0.2 \text{ A g}^{-1}$ .

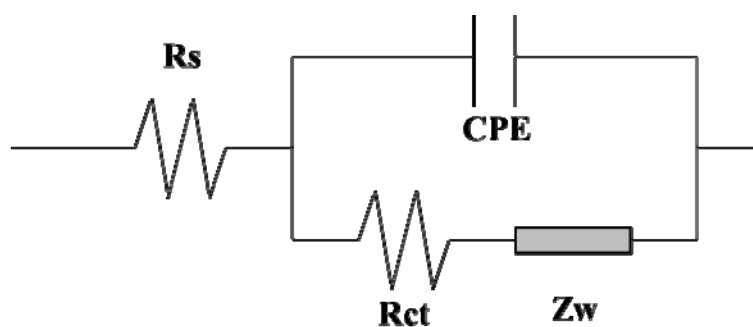

Figure S10. Randles equivalent circuit for 3D G/Sn/G and G/Sn electrode/electrolyte interface.  $R_s$  is the electrolyte resistance and the resistance of the surface film formed on the electrodes.  $R_{ct}$  is charge-transfer resistance,  $Z_w$  is the Warburg impedance related to the diffusion of lithium ions into the bulk electrodes and CPE represents the constant phase element.

Table S1. Comparison of rate performance of 3D G/Sn/G networks electrode with G/Sn sandwich nanosheets electrode on the basis of Figure 4d.

| Step number | Number of cycle | Charge/discharge rate (C, 1C = 1 A g <sup>-1</sup> ) | Average reversible capacity of 3D G/Sn/G networks electrode (mAh g <sup>-1</sup> ) | Average reversible capacity of G/Sn sandwich nanosheets electrode (mAh g <sup>-1</sup> ) |
|-------------|-----------------|------------------------------------------------------|------------------------------------------------------------------------------------|------------------------------------------------------------------------------------------|
| 1           | 20              | 0.2                                                  | 1011                                                                               | 535                                                                                      |
| 2           | 40              | 0.5                                                  | 871                                                                                | 452                                                                                      |
| 3           | 60              | 1                                                    | 757                                                                                | 385                                                                                      |
| 4           | 80              | 2                                                    | 695                                                                                | 285                                                                                      |
| 5           | 100             | 5                                                    | 438                                                                                | 123                                                                                      |
| 6           | 120             | 10                                                   | 241                                                                                | 64                                                                                       |
| 7           | 140             | 0.2                                                  | 1098                                                                               | 541                                                                                      |

Table S2. Comparison of specific capacity and capacity retention at different rates for 3D G/Sn/G networks electrode with those of graphene/Sn sandwich nanosheets, surface-decorated graphene/Sn composites, and various Sn/C composites anodes reported.

| Materials                             | Voltage range (V) | Current density (A g <sup>-1</sup> ) | Cycle number | Specific capacity (mAh g <sup>-1</sup> ) | Capacity retention (%) |
|---------------------------------------|-------------------|--------------------------------------|--------------|------------------------------------------|------------------------|
| 3D G/Sn/G networks [this work]        | 0.005–3.0         | 2                                    | 500          | 665                                      | 95.5                   |
|                                       |                   | 0.2                                  | 100          | 1010                                     | 97                     |
| Graphene/Sn sandwich nanosheets [S1]  | 0.005–2.0         | 0.05                                 | 60           | 590                                      | 69                     |
| Graphene/Sn sandwich nanosheets [S2]  | 0.002–3.0         | 1                                    | 30           | 501                                      | 86                     |
| Graphene/Sn sandwich nanosheets [S21] | 0.01–3.0          | 0.5                                  | 100          | 684.5                                    | 76                     |
|                                       |                   | 1                                    | 100          | 639.7                                    | 71                     |
|                                       |                   | 2                                    | 100          | 552.3                                    | 65                     |
|                                       |                   | 5                                    | 100          | 359.7                                    | 51                     |
| graphene/Sn composite [S16]           | 0.005–2.5         | 0.2                                  | 50           | 255                                      | 20                     |
| graphene/Sn composite [S17]           | 0.01–3.0          | 0.05                                 | 30           | 490                                      | 55                     |
| graphene/Sn composite [S19]           | 0.01–3.0          | 0.5                                  | 200          | 552                                      | 87                     |



|                                                  |           |       |     |       |       |
|--------------------------------------------------|-----------|-------|-----|-------|-------|
| graphene/Sn composite <sup>[S20]</sup>           | 0.02–1.2  | 0.1   | 100 | 500   | 80    |
| Sn@CNT/graphene composite <sup>[S3]</sup>        | 0.005–3.0 | 2     | 100 | 560   | 82    |
|                                                  |           | 1     | 100 | 650   | 78.5  |
| Sn@C/graphene composite <sup>[S4]</sup>          | 0.005–2.5 | 0.05  | 50  | 630   | 70    |
| Sn@C/graphene composite <sup>[S12]</sup>         | 0.01–3.0  | 0.75  | 100 | 566   | 53    |
| Sn/C composite <sup>[S6]</sup>                   | 0.02–3.0  | 0.2   | 130 | 680   | 94    |
| Sn/C composite <sup>[S7]</sup>                   | 0.02–3.0  | 0.025 | 300 | 638   | 93    |
| Sn/C composite <sup>[S15]</sup>                  | 0.01–1.5  | 0.1   | 100 | 450   | 93    |
| Sn/C composite <sup>[S18]</sup>                  | 0.01–3.0  | 0.2   | 200 | 722   | 92    |
| Sn@C@carbon fiber <sup>[S8]</sup>                | 0.01–3.0  | 0.25  | 200 | 737   | 88    |
| Sn@mesoporous carbon nanowires <sup>[S9]</sup>   | 0.005–2.0 | 0.1   | 50  | 710   | 57    |
| Sn@mesoporous carbon <sup>[S10]</sup>            | 0.005–2.0 | 0.05  | 100 | 560   | 86    |
| Sn@carbon nanotubes <sup>[S11]</sup>             | 0.01–2.5  | 0.1   | 100 | 437   | 36    |
| Sn@carbon nanotubes <sup>[S13]</sup>             | 0.01–2.5  | 1     | 100 | 335   | 62    |
| Sn@C nanowires <sup>[S14]</sup>                  | 0.005–2.0 | 0.1   | 100 | 525   | 55    |
|                                                  |           | 0.5   | 100 | 490   | 44    |
|                                                  |           | 1     | 100 | 486   | 39    |
|                                                  |           | 3     | 100 | 286   | 32    |
| Tin-carbon/silica composite <sup>[S5]</sup>      | 0.0–2.5   | 0.3   | 100 | 440   | 95    |
| Sn@CNT composite <sup>[S22]</sup>                | 0.005-3   | 0.1   | 80  | 473.9 | 90.1  |
| SnQDs@N-CNF composite <sup>[S23]</sup>           | 0.02-3    | 0.2   | 500 | 685   | 74    |
|                                                  |           | 0.4   | 200 | 508   | 67    |
| Sn-Co-CNT composite <sup>[S24]</sup>             | 0.005-3   | 0.099 | 200 | 811   | 91.1  |
|                                                  |           | 0.99  | 200 | 612   | 85.7  |
| TiO <sub>2</sub> -Sn/C nanowire <sup>[S25]</sup> | 0.01-3    | 0.335 | 160 | 459   | 99.9  |
|                                                  |           | 3.35  | 100 | 150   | 84.8  |
| SnNPs @CNTs composite <sup>[S26]</sup>           | 0.005-2   | 0.1   | 140 | 648   | 83.7  |
| SnNPs@h-CS composite <sup>[S27]</sup>            | 0.005-3   | 0.166 | 100 | 550   | 68.75 |
| Sn NP/CNF hybrid network                         | 0.01-3    | 0.2   | 200 | 460   | 57.93 |

|                                            |        |       |     |     |      |
|--------------------------------------------|--------|-------|-----|-----|------|
| composite <sup>[S28]</sup>                 |        |       |     |     |      |
| Sn-PCNF composite <sup>[S29]</sup>         | 0.01-3 | 0.8   | 200 | 774 | 93   |
| RGO/Sn composite <sup>[S30]</sup>          | 0.01-2 | 0.099 | 50  | 858 | 97   |
| Sn/graphene nanocomposite <sup>[S31]</sup> | 0.01-3 | 0.055 | 100 | 508 | 63.9 |

Table S3. Kinetic parameters of the electrodes of 3D G/Sn/G networks and G/Sn sandwich nanosheets after the rate capability test.

| Samples   | $R_f$ ( $\Omega$ ) | $R_{ct}$ ( $\Omega$ ) |
|-----------|--------------------|-----------------------|
| 3D G/Sn/G | 27.79              | 66.03                 |
| G/Sn      | 34.91              | 141.7                 |

## References

- [S1] B. Luo, B. Wang, X. L. Li, Y. Y. Jia, M. H. Liang, L. J. Zhi, *Adv. Mater.*, 2012, **24**, 3538–3543.
- [S2] L. Ji, Z. Tan, T. Kuykendall, E. J. An, Y. Fu, V. Battaglia, Y. Zhang, *Energy Environ. Sci.*, 2011, **4**, 3611–3616.
- [S3] Y. Zou, Y. Wang, *ACS Nano*, 2011, **5**, 8108–8114.
- [S4] B. Luo, B. Wang, M. H. Liang, J. Ning, X. L. Li, L. J. Zhi, *Adv. Mater.*, 2012, **24**, 1405–1409.
- [S5] J. K. Hwang, S. H. Woo, J. M. Shim, C. S. Jo, K. T. Lee, J. Lee, *ACS Nano*, 2013, **7**, 1036–1044.
- [S6] Y. H. Xu, Q. Liu, Y. J. Zhu, Y. H. Liu, A. Langrock, M. R. Zachariah, C. S. Wang, *Nano Lett.*, 2013, **13**, 470–474.
- [S7] X. F. Li, A. Dhanabalan, L. Gu, C. L. Wang, *Adv. Energy Mater.*, 2012, **2**, 238–244.
- [S8] Y. Yu, L. Gu, C. Wang, A. Dhanabalan, P.A. Van Aken, J. Maier, *Angew. Chem. Int. Ed.*, 2009, **48**, 6485–6489.

- [S9] Y. C. Qiu, K. Y. Yan, S. H. Yang, *Chem. Commun.*, 2010, **46**, 8359.
- [S10] Y. G. Wang, B. Li, C. L. Zhang, H. Tao, S. F. Kang, S. Jiang, X. Li, *J. Power Sources*, 2012, **219**, 89.
- [S11] X. Y. Hou, H. Jiang, Y. J. Hu, Y. F. Li, J. C. Huo, C. Z. Li, *ACS Appl. Mater. Interfaces*, 2013, **5**, 6672.
- [S12] D. N. Wang, X. F. Li, J. L. Yang, J. J. Wang, D. S. Geng, R. Y. Li, M. Cai, T. K. Sham, X. L. Sun, *Phys. Chem. Chem. Phys.*, 2013, **15**, 3535.
- [S13] H. K. Zhang, H. H. Song, X. H. Chen, J. S. Zhou, *J. Phys. Chem. C*, 2012, **116**, 22774.
- [S14] K. C. Hsu, C. E. Liu, P. C. Chen, C. Y. Lee, H. T. Chiu, *J. Mater. Chem.*, 2012, **22**, 21533.
- [S15] J. Hassoun, G. Derrien, S. Panero, B. Scrosati, *Adv. Mater.*, 2008, **20**, 3169.
- [S16] Z. H. Wen, S. M. Cui, H. J. Kim, S. Mao, K. H. Yu, G. H. Lu, H. H. Pu, O. Mao, J. H. Chen, *J. Mater. Chem.*, 2012, **22**, 3300.
- [S17] W. B. Yue, S. Yang, Y. Ren, X. J. Yang, *Electrochim. Acta*, 2013, **92**, 412.
- [S18] Z. Q. Zhu, S. W. Wang, J. Du, Q. Jin, T. R. Zhang, F. Y. Cheng, J. Chen, *Nano Lett.*, 2014, **14**, 153.
- [S19] J. S. Zhu, D. L. Wang, L. B. Cao, T. F. Liu, *J. Mater. Chem. A*, 2014, **2**, 12918.
- [S20] F. R. Beck, R. Epur, D. Hong, A. Manivannan, P. N. Kumta, *Electrochim. Acta*, 2014, **127**, 299.
- [S21] X. Y. Zhou, Y. L. Zou, J. Yang, *J. Power Sources*, 2014, **253**, 287-295.
- [S22] Y. Wang, M. Wu, Z. Jiao, J. Y. Lee, *Chem. Mater.*, 2009, **21**, 3210-3215.
- [S23] G. H. Zhang, J. Zhu, W. Zeng, S. C. Hou, F. L. Gong, F. Li, C. C. Li, H. G. Duan, *Nano Energy*, 2014, **9**, 61-70.
- [S24] Y. Gu, F. D. Wu, Y. Wang, *Adv. Funct. Mater.*, 2013, **23**, 893-899.
- [S25] J. Y. Liao, A. Manthiram, *Adv. Energy Mater.*, 2014, **4**, 1400403.

- [S26] Y. Yu, L. Gu, C. Zhu, P.A. Van Aken, J. Maier, *J. Am. Chem. Soc.*, 2009, **131**, 15984–15985.
- [S27] W. M. Zhang, J. S. Hu, Y. G. Guo, S. F. Zheng, L. S. Zhong, W. G. Song, L. J. Wan, *Adv. Mater.*, 2008, **20**, 1160–1165.
- [S28] J. Wang, W. L. Song, Z. Y. Wang, L. Z. Fan, Y. F. Zhang, *Electrochim. Acta*, 2015, **153**, 468–475.
- [S29] Z. Shen, Y. Hu, Y. L. Chen, X. W. Zhang, K. H. Wang, R. Z. Chen, *J. Power Sources*, 2015, **278**, 660-667.
- [S30] C. Nithya, S. Gopukumar, *CHEMSUSCHEM*, 2013, **6**, 898–904.
- [S31] G. X. Wang, B. Wang, X. H. Wang, J. Park, S. X. Dou, H. Ahn, K. Kim, *J. Mater. Chem.*, 2009, **19**, 8378–8384.
